# Supplementary material
Source: publisher site journal article supplement (https://www.dovepress.com/get_supplementary_file.php?f=461587.xlsx)
Supplement: Supplementary file 1 [file get_supplementary_file.php]

## Sheet: Sheet1
Table S1. List of the primers of 16S rRNA, resistance genes and virulence genes
Item	Gene	Primer	Annealing temperature (°C)	Amplicon size (bp)	References
Antibiotic resistance	erm(A)-F	TCAAAGCCTGTCGGAATTGG	56	441	Aarestrup FM, Jensen LB. Trends in antimicrobial susceptibility in relation to antimicrobial usage and presence of resistance genes in Staphylococcus hyicus isolated from exudative epidermitis in pigs. Veterinary microbiology. 2002;89(1):83-94.
	erm(A)-R	AAGCGGTAAACCCCTCTGAG
	erm(B)-F	CATTTAACGACGAAACTGGC	54	425	Aarestrup FM, Jensen LB. Trends in antimicrobial susceptibility in relation to antimicrobial usage and presence of resistance genes in Staphylococcus hyicus isolated from exudative epidermitis in pigs. Veterinary microbiology. 2002;89(1):83-94.
	erm(B)-R	GGAACATCTGTGGTATGGCG
	erm(C)-F	ATCTTTGAAATCGGCTCAGG	53	294	Aarestrup FM, Jensen LB. Trends in antimicrobial susceptibility in relation to antimicrobial usage and presence of resistance genes in Staphylococcus hyicus isolated from exudative epidermitis in pigs. Veterinary microbiology. 2002;89(1):83-94.
	erm(C)-R	CAAACCCGTATTCCACGATT
	tet(K)-F	TTAGGTGAAGGGTTAGGTCC	53	718	Aarestrup FM, Jensen LB. Trends in antimicrobial susceptibility in relation to antimicrobial usage and presence of resistance genes in Staphylococcus hyicus isolated from exudative epidermitis in pigs. Veterinary microbiology. 2002;89(1):83-94.
	tet(K)-R	GCAAACTCATTCCAGAAGCA
	tet(L)-F	CATTTGGTCTTATTGGATCG	50	456	Guerrero-Ramos E, Cordero J, Molina-González D, et al. Antimicrobial resistance and virulence genes in enterococci from wild game meat in Spain. Food microbiology. 2016;53:156-164.
	tet(L)-R	ATTACACTTCCGATTTCGG
	tet(M)-F	GTTAAATAGTGTTCTTGGAG	46	656	Aarestrup FM, Jensen LB. Trends in antimicrobial susceptibility in relation to antimicrobial usage and presence of resistance genes in Staphylococcus hyicus isolated from exudative epidermitis in pigs. Veterinary microbiology. 2002;89(1):83-94.
	tet(M)-R	CTAAGATATGGCTCTAACAA
	tet(O)-F	GATGGCATACAGGCACAGAC	55	614	Aarestrup FM, Jensen LB. Trends in antimicrobial susceptibility in relation to antimicrobial usage and presence of resistance genes in Staphylococcus hyicus isolated from exudative epidermitis in pigs. Veterinary microbiology. 2002;89(1):83-94.
	tet(O)-R	CAATATCACCAGAGCAGGCT
	tet(S)-F	TGGAACGCCAGAGAGGTATT	55	660	Guerrero-Ramos E, Cordero J, Molina-González D, et al. Antimicrobial resistance and virulence genes in enterococci from wild game meat in Spain. Food microbiology. 2016;53:156-164.
	tet(S)-R	ACATAGACAAGCCGTTGACC
Virulence	cylA-F	TGGATGATAGTGATAGGAAGT	61	517	Bhardwaj A, Gupta H, Kapila S, Kaur G, Vij S, Malik RK. Safety assessment and evaluation of probiotic potential of bacteriocinogenic Enterococcus faecium KH 24 strain under in vitro and in vivo conditions. International journal of food microbiology. 2010;141(3):156-164.
	cylA-R	TCTACAGTAAATCTTTCGTCA
	gelE-F	AGTTCATGTCTATTTTCTTCAC	56	402	Amaral DM, Silva LF, Casarotti SN, Nascimento LCS, Penna ALB. Enterococcus faecium and Enterococcus durans isolated from cheese: Survival in the presence of medications under simulated gastrointestinal conditions and adhesion properties. Journal of dairy science. 2017;100(2):933-949.
	gelE-R	CTTCATTATTTACACGTTTG
	hyl-F	ACAGAAGAGCTGCAGGAAATG	53	276	Amaral DM, Silva LF, Casarotti SN, Nascimento LCS, Penna ALB. Enterococcus faecium and Enterococcus durans isolated from cheese: Survival in the presence of medications under simulated gastrointestinal conditions and adhesion properties. Journal of dairy science. 2017;100(2):933-949.
	hyl-R	GACTGACGTCCAAGTTTCCA
	asa1-F	GCACGCTATTACGAACTATGA	60	375	Amaral DM, Silva LF, Casarotti SN, Nascimento LCS, Penna ALB. Enterococcus faecium and Enterococcus durans isolated from cheese: Survival in the presence of medications under simulated gastrointestinal conditions and adhesion properties. Journal of dairy science. 2017;100(2):933-949.
	asa1-R	TAAGAAAGAACATCACCACGA
	esp-F	AGATTTCATCTTTGATTCTTG	47	510	Amaral DM, Silva LF, Casarotti SN, Nascimento LCS, Penna ALB. Enterococcus faecium and Enterococcus durans isolated from cheese: Survival in the presence of medications under simulated gastrointestinal conditions and adhesion properties. Journal of dairy science. 2017;100(2):933-949.
	esp-R	AATTGATTCTTTAGCATCTGG
	cpd-F	TGGTGGGTTATTTTTCAATTC	47	782	Bhardwaj A, Gupta H, Kapila S, Kaur G, Vij S, Malik RK. Safety assessment and evaluation of probiotic potential of bacteriocinogenic Enterococcus faecium KH 24 strain under in vitro and in vivo conditions. International journal of food microbiology. 2010;141(3):156-164.
	cpd-R	TACGGCTCTGGCTTACTA
	frs-F	AACCAGAATCGACCAATGAAT	60	3268	Guerrero-Ramos E, Cordero J, Molina-González D, et al. Antimicrobial resistance and virulence genes in enterococci from wild game meat in Spain. Food microbiology. 2016;53:156-164.
	frs-R	GCCCCTCATAACTCAATACC
	ace-F	GAATTGAGCAAAAGTTCAATCG	48	1008	Amaral DM, Silva LF, Casarotti SN, Nascimento LCS, Penna ALB. Enterococcus faecium and Enterococcus durans isolated from cheese: Survival in the presence of medications under simulated gastrointestinal conditions and adhesion properties. Journal of dairy science. 2017;100(2):933-949.
	ace-R	GTCTGTCTTTTCACTTGTTTC
	efaAfs-F	GACAGACCCTCACGAATA	55	705	Guerrero-Ramos E, Cordero J, Molina-González D, et al. Antimicrobial resistance and virulence genes in enterococci from wild game meat in Spain. Food microbiology. 2016;53:156-164.
	efaAfs-R	AGTTCATCATGCTGTAGTA
	efaAfm-F	AACAGATCCGCATGAATA	50	735	Guerrero-Ramos E, Cordero J, Molina-González D, et al. Antimicrobial resistance and virulence genes in enterococci from wild game meat in Spain. Food microbiology. 2016;53:156-164.
	efaAfm-R	CATTTCATCATCTGATAGTA
	efaA-F	GCCAATTGGGACAGACCCTC	57	688	Amaral DM, Silva LF, Casarotti SN, Nascimento LCS, Penna ALB. Enterococcus faecium and Enterococcus durans isolated from cheese: Survival in the presence of medications under simulated gastrointestinal conditions and adhesion properties. Journal of dairy science. 2017;100(2):933-949.
	efaA-R	CGCCTTCTGTTCCTTCTTTGGC
16S rRNA	27F	AGAGTTTGATCCTGGCTCAG	58	1506	Feng Y, Qi W, WANG X-r, et al. Genetic characterization of antimicrobial resistance in Staphylococcus aureus isolated from bovine mastitis cases in Northwest China. Journal of integrative agriculture. 2016;15(12):2842-2847.
	1492R	TACGACTTAACCCCAATCGC
